# Supplementary material
Source: MDPI journal article supplement (https://www.mdpi.com/2073-4395/12/8/1975)
Supplement: s1 [file s1]

**Table S1.** Germination percentage, electrolyte leakage of seed membrane, and root length sum of wheat seeds after 48h of germination. Five soaking periods (SP), six soaking concentrations with sodium selenate (S), and interaction SP × S. Values are mean ± SE. Different letters demonstrate significant differences ( $p < 0.05$ ).

|                                   |         | Germination (%) | Electrolyte Leakage (%) | Root Length (mm) |                      |
|-----------------------------------|---------|-----------------|-------------------------|------------------|----------------------|
| Soaking Period (SP)               |         |                 |                         |                  |                      |
|                                   | 0h      | 97.3 ± 1.35 ab  | 12.3 ± 0.36 c           | 32.1 ± 1.64 d    |                      |
|                                   | 4h      | 95.3 ± 0.85 b   | 12.9 ± 0.69 c           | 41.5 ± 1.61 c    |                      |
|                                   | 9h      | 98.6 ± 0.35 a   | 15.8 ± 0.56 b           | 57.1 ± 1.75 b    |                      |
|                                   | 12h     | 95.2 ± 1.31 ab  | 16.7 ± 0.65 b           | 84.3 ± 2.52 a    |                      |
|                                   | 24h     | 97.4 ± 0.68 ab  | 18.0 ± 0.72 a           | 63.7 ± 1.91 b    |                      |
| Soaking (S)                       |         |                 |                         |                  |                      |
|                                   | 0 mM    | 98.1 ± 0.61 a   | 14.8 ± 0.70 b           | 52.4 ± 3.12 bc   |                      |
|                                   | 0.25 mM | 95.6 ± 1.02 a   | 14.4 ± 0.49 b           | 66.1 ± 2.94 a    |                      |
|                                   | 0.50 mM | 97.0 ± 0.95 a   | 15.2 ± 0.78 ab          | 64.9 ± 3.23 a    |                      |
|                                   | 2.5 mM  | 96.8 ± 0.94 a   | 14.0 ± 0.75 b           | 64.6 ± 3.06 a    |                      |
|                                   | 5 mM    | 98.5 ± 0.42 a   | 14.1 ± 0.65 b           | 60.9 ± 3.28 ab   |                      |
|                                   | 25 mM   | 93.2 ± 1.74 b   | 16.9 ± 1.12 a           | 46.9 ± 2.79 c    |                      |
| SP x S                            |         |                 |                         |                  |                      |
|                                   | 0h      | 0 mM            | 97.3 ± 1.35 ab          | 11.8 ± 0.38 c    | 32.1 ± 1.64 k        |
|                                   | 4h      | 0 mM            | 99.0 ± 0.58 a           | 14.5 ± 0.68 bc   | 37.5 ± 4.73 k        |
|                                   |         | 0.25 mM         | 92.9 ± 0.68 ab          | 14.4 ± 0.99 bc   | 44.0 ± 3.95 hijk     |
|                                   |         | 0.50 mM         | 91.9 ± 0.59 ab          | 10.5 ± 1.07 c    | 39.0 ± 3.47 jk       |
|                                   |         | 2.5 mM          | 98.7 ± 0.88 ab          | 10.4 ± 1.14 c    | 51.9 ± 3.23 fghijk   |
|                                   |         | 5 mM            | 97.7 ± 1.20 ab          | 12.5 ± 1.66 bc   | 37.2 ± 3.19 jk       |
|                                   |         | 25 mM           | 91.6 ± 1.44 ab          | 13.8 ± 2.85 bc   | 38.8 ± 3.23 ijk      |
|                                   | 9h      | 0 mM            | 99.3 ± 0.67 a           | 14.8 ± 2.02 bc   | 62.1 ± 3.23 cdefghi  |
|                                   |         | 0.25 mM         | 98.7 ± 0.88 ab          | 16.1 ± 1.81 abc  | 63.7 ± 3.29 cdefgh   |
|                                   |         | 0.50 mM         | 98.3 ± 1.20 ab          | 17.1 ± 2.31 abc  | 58.8 ± 3.84 efghij   |
|                                   |         | 2.5 mM          | 98.3 ± 0.88 ab          | 16.8 ± 0.70 abc  | 47.8 ± 3.76 ghijk    |
|                                   |         | 5 mM            | 98.7 ± 0.88 a           | 13.8 ± 0.54 bc   | 66.4 ± 4.38 cdefgh   |
|                                   |         | 25 mM           | 98.0 ± 1.15 ab          | 17.0 ± 1.08 abc  | 44.3 ± 3.22 hijk     |
|                                   | 12h     | 0 mM            | 98.3 ± 0.88 ab          | 15.8 ± 1.96 bc   | 93.6 ± 5.82 a        |
|                                   |         | 0.25 mM         | 91.9 ± 0.59 ab          | 15.2 ± 1.06 bc   | 89.6 ± 4.37 ab       |
|                                   |         | 0.50 mM         | 99.0 ± 0.58 a           | 15.5 ± 1.30 bc   | 89.3 ± 4.03 ab       |
|                                   |         | 2.5 mM          | 98.3 ± 0.88 ab          | 13.2 ± 1.07 bc   | 84.4 ± 5.40 abc      |
|                                   |         | 5 mM            | 99.0 ± 0.58 ab          | 15.2 ± 1.49 bc   | 81.8 ± 5.91 abcd     |
|                                   |         | 25 mM           | 84.8 ± 0.78 b           | 19.2 ± 1.65 ab   | 59.3 ± 8.58 defghijk |
|                                   | 24h     | 0 mM            | 98.3 ± 0.88 ab          | 17.3 ± 1.68 c    | 70.2 ± 3.43 bcdefg   |
|                                   |         | 0.25 mM         | 99.0 ± 0.58 a           | 15.3 ± 0.58 bc   | 65.4 ± 2.90 cdefgh   |
|                                   |         | 0.50 mM         | 98.7 ± 0.67 ab          | 17.4 ± 1.23 abc  | 70.7 ± 2.85 bcdef    |
|                                   |         | 2.5 mM          | 91.7 ± 0.01 ab          | 17.6 ± 1.48 abc  | 75.0 ± 2.82 abcde    |
|                                   |         | 5 mM            | 98.7 ± 0.88 ab          | 17.2 ± 1.64 abc  | 56.7 ± 4.29 efghijk  |
|                                   |         | 25 mM           | 98.3 ± 0.88 ab          | 23.2 ± 1.98 a    | 46.5 ± 5.43 hijk     |
| Two-way ANOVA ( <i>p</i> -values) |         |                 |                         |                  |                      |
|                                   | SP      | <0.0001         | <0.0001                 | <0.0001          |                      |
|                                   | S       | 0.0170          | 0.0090                  | <0.0001          |                      |
|                                   | SP x S  | 0.0040          | 0.0420                  | <0.0001          |                      |

**Table S2.** Seedling height (mm), number of leaves, length of total leaves (mm) number of visible tillers and tillers length (mm), of wheat seedlings developed from fourteen (emergence) to fifty-six days after sowing (DAS). Values are means  $\pm$  SE (n = 80). Different letters demonstrate significant differences ( $p < 0.05$ ).

|                                   |           | Seedling Height<br>(mm) | Leaves Number<br>(n <sup>o</sup> ) | Length of Total<br>Leaves (mm) | Tillers Number<br>(n <sup>o</sup> ) | Tillers Length<br>(mm) |
|-----------------------------------|-----------|-------------------------|------------------------------------|--------------------------------|-------------------------------------|------------------------|
| Days After Sowing (DAS)           |           |                         |                                    |                                |                                     |                        |
|                                   | 14        | 8.0 ± 0.29 f            | 0.8 ± 0.02 g                       | 8.0 ± 0.29 g                   | 0.0 ± 0.00 c                        | 0.0 ± 0.00 c           |
|                                   | 21        | 60 ± 0.51 e             | 1.0 ± 0.01 f                       | 60 ± 0.51 f                    | 0.0 ± 0.00 c                        | 0.0 ± 0.00 c           |
|                                   | 28        | 76 ± 0.55 d             | 2.0 ± 0.01 e                       | 133 ± 1.17 e                   | 0.0 ± 0.00 c                        | 0.0 ± 0.00 c           |
|                                   | 35        | 92 ± 0.75 c             | 2.6 ± 0.02 d                       | 184 ± 1.76 d                   | 0.0 ± 0.00 c                        | 0.0 ± 0.00 c           |
|                                   | 42        | 98 ± 0.74 b             | 2.9 ± 0.01 c                       | 222 ± 2.12 c                   | 0.0 ± 0.01 c                        | 0.0 ± 0.00 c           |
|                                   | 49        | 101 ± 0.74 ab           | 3.6 ± 0.02 b                       | 296 ± 3.30 b                   | 0.5 ± 0.02 b                        | 13.9 ± 0.87 b          |
|                                   | 56        | 103 ± 0.79 a            | 4.1 ± 0.02 a                       | 390 ± 5.07 a                   | 0.9 ± 0.04 a                        | 34.1 ± 1.32 a          |
| Soaking (S)                       |           |                         |                                    |                                |                                     |                        |
|                                   | Untreated | 74 ± 1.02 b             | 2.4 ± 0.04 b                       | 180 ± 3.99                     | 0.225 ± 0.02 a                      | 7.6 ± 0.54 ab          |
|                                   | Water     | 77 ± 1.60 a             | 2.3 ± 0.05 b                       | 178 ± 5.77                     | 0.174 ± 0.02 b                      | 6.0 ± 0.75 bc          |
|                                   | 2.5mM     | 79 ± 1.14 a             | 2.4 ± 0.04 b                       | 185 ± 4.25                     | 0.169 ± 0.01 b                      | 5.9 ± 0.54 c           |
|                                   | 25mM      | 73 ± 1.09 b             | 2.5 ± 0.04 a                       | 183 ± 4.34                     | 0.241 ± 0.02 a                      | 8.3 ± 0.62 a           |
| DAS x S                           |           |                         |                                    |                                |                                     |                        |
| 14                                | Untreated | 5.0 ± 0.35 l            | 0.7 ± 0.03 j                       | 5.0 ± 0.35 h                   | 0.0 ± 0.00 f                        | 0.0 ± 0.00 d           |
|                                   | Water     | 10 ± 0.75 kl            | 0.8 ± 0.04 hi                      | 10 ± 0.75 h                    | 0.0 ± 0.00 f                        | 0.0 ± 0.00 d           |
|                                   | 2.5mM     | 11 ± 0.61 k             | 0.9 ± 0.03 hi                      | 11 ± 0.61 h                    | 0.0 ± 0.00 f                        | 0.0 ± 0.00 d           |
|                                   | 25mM      | 8.0 ± 0.55 kl           | 0.7 ± 0.04 ij                      | 8.0 ± 0.55 h                   | 0.0 ± 0.00 f                        | 0.0 ± 0.00 d           |
| 21                                | Untreated | 57 ± 0.66 j             | 1.0 ± 0.01 h                       | 57 ± 0.66 g                    | 0.0 ± 0.00 f                        | 0.0 ± 0.00 d           |
|                                   | Water     | 62 ± 1.10 j             | 1.0 ± 0.01 h                       | 62 ± 1.10 g                    | 0.0 ± 0.00 f                        | 0.0 ± 0.00 d           |
|                                   | 2.5mM     | 62 ± 1.18 j             | 1.0 ± 0.01 h                       | 62 ± 1.18 g                    | 0.0 ± 0.00 f                        | 0.0 ± 0.00 d           |
|                                   | 25mM      | 60 ± 1.04 j             | 1.0 ± 0.01 h                       | 60 ± 1.04 g                    | 0.0 ± 0.00 f                        | 0.0 ± 0.00 d           |
| 28                                | Untreated | 74 ± 0.93 i             | 2.0 ± 0.01 g                       | 128 ± 1.95 f                   | 0.0 ± 0.00 f                        | 0.0 ± 0.00 d           |
|                                   | Water     | 79 ± 1.64 hi            | 2.0 ± 0.01 g                       | 134 ± 3.53 f                   | 0.0 ± 0.00 f                        | 0.0 ± 0.00 d           |
|                                   | 2.5mM     | 80 ± 0.99 h             | 2.0 ± 0.01 g                       | 139 ± 2.15 f                   | 0.0 ± 0.00 f                        | 0.0 ± 0.00 d           |
|                                   | 25mM      | 74 ± 1.04 hi            | 2.0 ± 0.01 g                       | 132 ± 2.28 f                   | 0.0 ± 0.00 f                        | 0.0 ± 0.00 d           |
| 35                                | Untreated | 91 ± 1.16 g             | 2.5 ± 0.04 f                       | 179 ± 2.81 e                   | 0.0 ± 0.00 f                        | 0.0 ± 0.00 d           |
|                                   | Water     | 93 ± 2.15 efg           | 2.4 ± 0.06 f                       | 182 ± 4.67 e                   | 0.0 ± 0.00 f                        | 0.0 ± 0.00 d           |
|                                   | 2.5mM     | 96 ± 1.51 efg           | 2.5 ± 0.04 f                       | 190 ± 3.49 e                   | 0.0 ± 0.00 f                        | 0.0 ± 0.00 d           |
|                                   | 25mM      | 89 ± 1.53 g             | 2.7 ± 0.04 e                       | 186 ± 3.66 e                   | 0.0 ± 0.00 f                        | 0.0 ± 0.00 d           |
| 42                                | Untreated | 96 ± 1.15 def           | 2.9 ± 0.02 d                       | 215 ± 3.54 d                   | 0.0 ± 0.00 f                        | 0.0 ± 0.00 d           |
|                                   | Water     | 100 ± 2.41 abcdef       | 2.9 ± 0.04 de                      | 221 ± 6.40 d                   | 0.0 ± 0.00 f                        | 0.0 ± 0.00 d           |
|                                   | 2.5mM     | 103 ± 1.36 abc          | 2.9 ± 0.02 d                       | 230 ± 3.86 d                   | 0.0 ± 0.00 f                        | 0.0 ± 0.00 d           |
|                                   | 25mM      | 93 ± 1.40 fg            | 3.0 ± 0.02 d                       | 222 ± 4.23 d                   | 0.0 ± 0.00 f                        | 0.0 ± 0.00 d           |
| 49                                | Untreated | 100 ± 1.18 bcdef        | 3.5 ± 0.04 c                       | 296 ± 5.79 c                   | 0.5 ± 0.01 de                       | 14.3 ± 1.54 c          |
|                                   | Water     | 101 ± 2.21 abcdef       | 3.5 ± 0.06 c                       | 288 ± 8.85 c                   | 0.4 ± 0.10 de                       | 11.7 ± 2.33 c          |
|                                   | 2.5mM     | 104 ± 1.52 ab           | 3.5 ± 0.04 c                       | 301 ± 6.21 c                   | 0.4 ± 0.01 e                        | 11.3 ± 1.58 c          |
|                                   | 25mM      | 97 ± 1.37 cdef          | 3.7 ± 0.04 b                       | 295 ± 6.55 c                   | 0.6 ± 0.01 cd                       | 17.0 ± 1.75 c          |
| 56                                | Untreated | 103 ± 1.29 ab           | 4.1 ± 0.04 a                       | 406 ± 9.33 a                   | 1.1 ± 0.10 a                        | 37.5 ± 2.33 a          |
|                                   | Water     | 104 ± 2.44 abcd         | 4.0 ± 0.03 a                       | 369 ± 12.4 b                   | 0.8 ± 0.10 bc                       | 28.8 ± 3.46 b          |
|                                   | 2.5mM     | 107 ± 1.65 a            | 4.0 ± 0.03 a                       | 383 ± 9.82 ab                  | 0.8 ± 0.10 b                        | 28.4 ± 2.57 b          |
|                                   | 25mM      | 99 ± 1.32 abc           | 4.1 ± 0.03 a                       | 389 ± 9.42 ab                  | 1.0 ± 0.10 a                        | 38.4 ± 2.45 a          |
| Two-way ANOVA ( <i>p</i> -values) |           |                         |                                    |                                |                                     |                        |
|                                   | DAS       | <0.0001                 | <0.0001                            | <0.0001                        | <0.0001                             | <0.0001                |
|                                   | S         | <0.0001                 | <0.0001                            | 0.1282                         | <0.0001                             | <0.0001                |
|                                   | DAS x S   | 0.0349                  | <0.0001                            | 0.0047                         | <0.0001                             | <0.0001                |

**Table S3.** Net photosynthetic rate (A,  $\mu\text{mol CO}_2 \text{ m}^{-2} \text{ s}^{-1}$ ), respiration rate (E,  $\text{g H}_2\text{O m}^{-2} \text{ h}^{-1}$ ), stomatal conductance ( $g_s$ ,  $\text{mmol H}_2\text{O m}^{-2} \text{ s}^{-1}$ ), intrinsic water use efficiency (A/ $g_s$ ,  $\mu\text{mol mol}^{-1}$ ), and ratio of intercellular to atmospheric  $\text{CO}_2$  concentration ( $C_i/C_a$ ) among wheat plants (means  $\pm$  SE,  $n=12$ ) under two water regimes (W) and four soaking treatments (S). Different letters demonstrate significant differences ( $p < 0.05$ ).

|                                              |              | A                  | E                   | $g_s$             | A/ $g_s$            | $C_i/C_a$         |
|----------------------------------------------|--------------|--------------------|---------------------|-------------------|---------------------|-------------------|
| <b>Watering Regime (W)</b>                   |              |                    |                     |                   |                     |                   |
|                                              | WW           | 22.9 $\pm$ 1.41 a  | 5.19 $\pm$ 0.34 a   | 497 $\pm$ 54.0 a  | 49.8 $\pm$ 3.84 b   | 0.719 $\pm$ 0.016 |
|                                              | WD           | 16.1 $\pm$ 0.60 b  | 3.70 $\pm$ 0.20 b   | 294 $\pm$ 15.7 b  | 55.4 $\pm$ 1.73 a   | 0.723 $\pm$ 0.008 |
| <b>Soaking (S)</b>                           |              |                    |                     |                   |                     |                   |
|                                              | Untreated    | 17.6 $\pm$ 1.17 b  | 3.87 $\pm$ 0.472 b  | 332 $\pm$ 42.1 b  | 57.5 $\pm$ 3.74 ab  | 0.714 $\pm$ 0.013 |
|                                              | Water        | 20.1 $\pm$ 1.84 ab | 4.60 $\pm$ 0.406 ab | 419 $\pm$ 51.5 a  | 49.4 $\pm$ 2.64 b   | 0.73 $\pm$ 0.013  |
|                                              | 2.5 mM Se    | 20.6 $\pm$ 2.17 a  | 4.90 $\pm$ 0.522 a  | 465 $\pm$ 76.1 a  | 48.1 $\pm$ 3.68 b   | 0.74 $\pm$ 0.013  |
|                                              | 25 mM Se     | 17.4 $\pm$ 1.21 b  | 3.76 $\pm$ 0.228 b  | 293 $\pm$ 22.4 b  | 60.3 $\pm$ 2.79 a   | 0.694 $\pm$ 0.013 |
| <b>W <math>\times</math> S</b>               |              |                    |                     |                   |                     |                   |
| WW                                           | Untreated    | 20.2 $\pm$ 0.81    | 5.11 $\pm$ 0.200    | 428 $\pm$ 31.7 bc | 48.1 $\pm$ 3.61 bc  | 0.742 $\pm$ 0.011 |
|                                              | Water        | 25.1 $\pm$ 1.17    | 5.66 $\pm$ 0.181    | 553 $\pm$ 48.8 ab | 46.0 $\pm$ 3.94 bc  | 0.726 $\pm$ 0.023 |
|                                              | 2.5 mM Se    | 25.5 $\pm$ 2.12    | 6.01 $\pm$ 0.508    | 647 $\pm$ 66.2 a  | 40.6 $\pm$ 5.02 c   | 0.752 $\pm$ 0.025 |
|                                              | 25 mM Se     | 18.7 $\pm$ 1.87    | 4.02 $\pm$ 0.235    | 305 $\pm$ 25.4 cd | 61.7 $\pm$ 4.80 ab  | 0.680 $\pm$ 0.023 |
| WD                                           | Untreated    | 14.4 $\pm$ 0.95    | 2.63 $\pm$ 0.448    | 212 $\pm$ 17.0 d  | 66.9 $\pm$ 2.42 a   | 0.685 $\pm$ 0.016 |
|                                              | Water        | 16.4 $\pm$ 0.49    | 3.81 $\pm$ 0.264    | 318 $\pm$ 14.9 cd | 51.9 $\pm$ 3.44 abc | 0.733 $\pm$ 0.018 |
|                                              | 2.5 mM Se    | 15.6 $\pm$ 1.13    | 3.80 $\pm$ 0.453    | 283 $\pm$ 24.4 cd | 55.5 $\pm$ 0.93 abc | 0.728 $\pm$ 0.006 |
|                                              | 25 mM Se     | 16.2 $\pm$ 1.54    | 3.50 $\pm$ 0.379    | 281 $\pm$ 40.2 cd | 58.9 $\pm$ 3.46 ab  | 0.707 $\pm$ 0.013 |
| <b>Two-way ANOVA (<math>p</math>-values)</b> |              |                    |                     |                   |                     |                   |
|                                              | W            | 0.0001             | 0.0001              | 0.0001            | 0.0015              | 0.3328            |
|                                              | S            | 0.0208             | 0.0071              | 0.0001            | 0.0046              | 0.0686            |
|                                              | W $\times$ S | 0.0524             | 0.0559              | 0.0011            | 0.0250              | 0.0826            |

**Table S4.** Maximum (Fv/Fm) and actual quantum efficiency of photosystem II ( $\Phi$ PSII), maximum efficiency of PSII at open reaction centers ( $F'v/F'm$ ), photochemical quenching (qP), non-photochemical quenching (NPQ), apparent electron transport rate (ETR,  $\mu\text{mol e}^- \text{m}^{-2} \text{s}^{-1}$ ), quantum yield of non-regulated energy dissipation in PSII ( $\Phi$ NO), quantum yield of regulated energy dissipation in PSII ( $\Phi$ NPQ) among wheat plants in two water regimes (W) and four soaking treatments (S). Values are means  $\pm$  SE (n=12). Different letters indicate statistically significant differences ( $p < 0.05$ ).

|                          |         |               | ΦPSII         | Fv/Fm           | F'v/F'm         | qP            | NPQ             | ETR        | ΦNO           | ΦNPQ            | ΦNP           |
|--------------------------|---------|---------------|---------------|-----------------|-----------------|---------------|-----------------|------------|---------------|-----------------|---------------|
| Watering Regime (W)      |         |               |               |                 |                 |               |                 |            |               |                 |               |
| WW                       |         | 0.893 ± 0.004 | 0.542 ± 0.021 | 0,893 ± 0,004 a | 0.779 ± 0.007 a | 0.695 ± 0.027 | 0.751 ± 0.044 b | 114 ± 4.5  | 0.265 ± 0.017 | 0.193 ± 0.007 b | 0.458 ± 0.021 |
|                          |         |               |               |                 |                 |               |                 |            |               |                 |               |
| WD                       |         | 0.873 ± 0.004 | 0.502 ± 0.021 | 0,873 ± 0,004 b | 0.740 ± 0.014 b | 0.685 ± 0.039 | 1.117 ± 0.144 a | 106 ± 4.5  | 0.243 ± 0.014 | 0.254 ± 0.022 a | 0.498 ± 0.021 |
|                          |         |               |               |                 |                 |               |                 |            |               |                 |               |
| Soaking (S)              |         |               |               |                 |                 |               |                 |            |               |                 |               |
|                          | Untreat | 0.879 ± 0.004 | 0.523 ± 0.022 | 0,879 ± 0,004   | 0.772 ± 0.013   | 0.678 ± 0.029 | 1.026 ± 0.142   | 110 ± 5.0  | 0.240 ± 0.011 | 0.238 ± 0.025   | 0.477 ± 0.022 |
|                          | d       |               |               |                 |                 |               |                 |            |               |                 |               |
|                          | Water   | 0.874 ± 0.006 | 0.493 ± 0.033 | 0,874 ± 0,006   | 0.755 ± 0.015   | 0.655 ± 0.047 | 1.011 ± 0.155   | 104 ± 7.0  | 0.264 ± 0.029 | 0.243 ± 0.023   | 0.507 ± 0.033 |
|                          |         |               |               |                 |                 |               |                 |            |               |                 |               |
| 2.5 mM Se                |         | 0.892 ± 0.007 | 0.526 ± 0.020 | 0,892 ± 0,007   | 0.759 ± 0.019   | 0.699 ± 0.041 | 0.793 ± 0.054   | 110 ± 4.1  | 0.265 ± 0.009 | 0.209 ± 0.015   | 0.474 ± 0.020 |
|                          |         |               |               |                 |                 |               |                 |            |               |                 |               |
| 25 mM Se                 |         | 0.882 ± 0.006 | 0.548 ± 0.024 | 0,882 ± 0,006   | 0.765 ± 0.012   | 0.716 ± 0.032 | 0.999 ± 0.191   | 115 ± 5.1  | 0.234 ± 0.014 | 0.219 ± 0.029   | 0.452 ± 0.024 |
|                          |         |               |               |                 |                 |               |                 |            |               |                 |               |
| W x S                    |         |               |               |                 |                 |               |                 |            |               |                 |               |
| WW                       | Untreat | 0.885 ± 0.004 | 0.532 ± 0.024 | 0,885 ± 0,004   | 0.786 ± 0.017   | 0.676 ± 0.016 | 0.803 ± 0.103   | 112 ± 5.1  | 0.261 ± 0.012 | 0.208 ± 0.022   | 0.468 ± 0.024 |
|                          | d       |               |               |                 |                 |               |                 |            |               |                 |               |
|                          | Water   | 0.880 ± 0.006 | 0.511 ± 0.058 | 0,880 ± 0,006   | 0.773 ± 0.005   | 0.660 ± 0.058 | 0.688 ± 0.074   | 107 ± 12.2 | 0.295 ± 0.045 | 0.194 ± 0.014   | 0.489 ± 0.058 |
|                          |         |               |               |                 |                 |               |                 |            |               |                 |               |
| 2.5 mM Se                |         | 0.905 ± 0.006 | 0.529 ± 0.022 | 0,905 ± 0,006   | 0.778 ± 0.016   | 0.680 ± 0.014 | 0.735 ± 0.025   | 111 ± 3.0  | 0.227 ± 0.012 | 0.199 ± 0.004   | 0.471 ± 0.014 |
|                          |         |               |               |                 |                 |               |                 |            |               |                 |               |
| 25 mM Se                 |         | 0.893 ± 0.006 | 0.586 ± 0.025 | 0,893 ± 0,006   | 0.787 ± 0.014   | 0.745 ± 0.019 | 0.831 ± 0.107   | 123 ± 4.1  | 0.272 ± 0.011 | 0.186 ± 0.020   | 0.414 ± 0.019 |
|                          |         |               |               |                 |                 |               |                 |            |               |                 |               |
| WD                       | Untreat | 0.873 ± 0.006 | 0.514 ± 0.039 | 0,893 ± 0,006   | 0.759 ± 0.020   | 0.679 ± 0.061 | 1.250 ± 0.223   | 108 ± 8.3  | 0.218 ± 0.013 | 0.279 ± 0.042   | 0.486 ± 0.039 |
|                          | d       |               |               |                 |                 |               |                 |            |               |                 |               |
|                          | Water   | 0.869 ± 0.009 | 0.475 ± 0.070 | 0,869 ± 0,009   | 0.736 ± 0.027   | 0.651 ± 0.040 | 1.335 ± 0.191   | 100 ± 8.4  | 0.232 ± 0.034 | 0.293 ± 0.026   | 0.525 ± 0.040 |
|                          |         |               |               |                 |                 |               |                 |            |               |                 |               |
| 2.5 mM Se                |         | 0.878 ± 0.009 | 0.523 ± 0.085 | 0,878 ± 0,009   | 0.740 ± 0.034   | 0.718 ± 0.040 | 0.852 ± 0.104   | 110 ± 8.4  | 0.257 ± 0.014 | 0.220 ± 0.031   | 0.477 ± 0.040 |
|                          |         |               |               |                 |                 |               |                 |            |               |                 |               |
| 25 mM Se                 |         | 0.871 ± 0.006 | 0.509 ± 0.061 | 0,871 ± 0,006   | 0.743 ± 0.014   | 0.688 ± 0.037 | 1.166 ± 0.375   | 107 ± 7.8  | 0.240 ± 0.028 | 0.251 ± 0.054   | 0.491 ± 0.037 |
|                          |         |               |               |                 |                 |               |                 |            |               |                 |               |
| Two-way ANOVA (p-values) |         |               |               |                 |                 |               |                 |            |               |                 |               |
|                          | W       | 0.0010        | 0.1985        | 0,0010          | 0.0189          | 0.8732        | 0.0062          | 0.1985     | 0.1328        | 0.0091          | 0.1985        |
|                          | S       | 0.1058        | 0.5258        | 0,1058          | 0.8317          | 0.7361        | 0.5448          | 0.5258     | 0.4715        | 0.6513          | 0.5258        |
|                          | W x S   | 0.5892        | 0.7766        | 0,5892          | 0.9781          | 0.8704        | 0.5407          | 0.7766     | 0.4501        | 0.6501          | 0.7766        |

**Table S5.** Chlorophyll *a* (Chl *a*, mg g<sup>-1</sup> DW), chlorophyll *b* (Chl *b*, mg g<sup>-1</sup> DW), chlorophyll *a+b* (Chl (*a+b*), mg g<sup>-1</sup> DW), chlorophyll ratio (Chl *a*/Chl *b*), carotenoids (car, mg g<sup>-1</sup> DW), and chlorophyll/carotenoids ratio (Chl/Car) of wheat plants. Two water regimes (W) and four soaking treatments (S) were performed. Values are means ± SE of DW (n = 12). Different letters indicate statistically significant differences (*p* < 0.05).

|                                        |           | Chl <i>a</i>   | Chl <i>b</i>   | Car            | Chl <i>a+b</i> | Chl <i>a</i> /Chl <i>b</i> | Chl/Car         |
|----------------------------------------|-----------|----------------|----------------|----------------|----------------|----------------------------|-----------------|
| <b>Watering Regime (W)</b>             |           |                |                |                |                |                            |                 |
| WW                                     |           | 14.6 ± 0.353 a | 8.23 ± 0.201 a | 3.54 ± 0.075 a | 21.6 ± 0.515 a | 1.77 ± 0.007 a             | 6.05 ± 0.035 a  |
| WD                                     |           | 10.3 ± 0.157 b | 6.22 ± 0.098 b | 2.70 ± 0.037 b | 15.7 ± 0.243 b | 1.67 ± 0.009 b             | 5.83 ± 0.041 b  |
| <b>Soaking (S)</b>                     |           |                |                |                |                |                            |                 |
|                                        | Untreat   | 13.9 ± 0.146 a | 7.68 ± 0.110 b | 3.52 ± 0.040 a | 20.4 ± 0.240 a | 1.86 ± 0.010 a             | 5.86 ± 0.041 bc |
|                                        | Water     | 14.0 ± 0.581 a | 8.14 ± 0.299 a | 3.36 ± 0.122 a | 20.9 ± 0.825 a | 1.71 ± 0.015 c             | 6.13 ± 0.048 a  |
|                                        | 2.5 mM Se | 10.8 ± 0.312 c | 6.37 ± 0.130 d | 2.76 ± 0.066 c | 16.3 ± 0.411 c | 1.70 ± 0.015 c             | 5.92 ± 0.026 b  |
|                                        | 25 mM Se  | 12.5 ± 0.534 b | 7.12 ± 0.266 c | 3.21 ± 0.111 b | 18.6 ± 0.747 b | 1.75 ± 0.013 b             | 5.77 ± 0.046 c  |
| <b>W x S</b>                           |           |                |                |                |                |                            |                 |
| WW                                     | Untreated | 14.4 ± 0.116 b | 8.11 ± 0.105 b | 3.60 ± 0.040 b | 21.3 ± 0.175 b | 1.78 ± 0.022 ab            | 5.93 ± 0.062 bc |
|                                        | Water     | 16.6 ± 0.404 a | 9.43 ± 0.292 a | 3.96 ± 0.075 a | 24.7 ± 0.658 a | 1.77 ± 0.015 bc            | 6.25 ± 0.065 a  |
|                                        | 2.5 mM Se | 12.3 ± 0.073 d | 6.97 ± 0.050 c | 3.05 ± 0.027 d | 18.2 ± 0.112 d | 1.76 ± 0.007 bc            | 5.97 ± 0.037 bc |
|                                        | 25 mM Se  | 15.1 ± 0.099 b | 8.40 ± 0.049 b | 3.75 ± 0.037 b | 22.2 ± 0.120 b | 1.79 ± 0.011 ab            | 5.94 ± 0.033 bc |
| WD                                     | Untreat   | 13.3 ± 0.170 c | 7.26 ± 0.089 c | 3.42 ± 0.046 c | 19.5 ± 0.233 c | 1.84 ± 0.014 a             | 5.79 ± 0.038 cd |
|                                        | Water     | 11.5 ± 0.121 d | 6.96 ± 0.084 c | 2.91 ± 0.038 d | 17.5 ± 0.186 d | 1.66 ± 0.012 de            | 6.03 ± 0.057 b  |
|                                        | 2.5 mM Se | 9.4 ± 0.104 f  | 5.77 ± 0.057 d | 2.45 ± 0.033 f | 14.3 ± 0.143 e | 1.63 ± 0.010 e             | 5.86 ± 0.030 bc |
|                                        | 25 mM Se  | 10.2 ± 0.088 e | 5.94 ± 0.079 d | 2.73 ± 0.028 e | 15.3 ± 0.148 e | 1.71 ± 0.016 cd            | 5.59 ± 0.049 d  |
| <b>Two-way ANOVA (<i>p</i>-values)</b> |           |                |                |                |                |                            |                 |
|                                        | W         | <0.0001        | <0.0001        | <0.0001        | <0.0001        | <0.0001                    | <0.0001         |
|                                        | S         | <0.0001        | <0.0001        | <0.0001        | <0.0001        | <0.0001                    | <0.0001         |
|                                        | W x S     | <0.0001        | <0.0001        | <0.0001        | <0.0001        | 0.1197                     | 0.0660          |

**Table S6.** Total Phenols (TPC, mg GAE g<sup>-1</sup> DW), total flavonoids (TFC, mg CE g<sup>-1</sup> DW), ortho-diphenols (OD, mg GAE g<sup>-1</sup> DW), ABTS<sup>+</sup>, (μM TE g<sup>-1</sup> DW), total soluble sugars (TSS, mg g<sup>-1</sup> DW), and total soluble proteins (TSP, mg g<sup>-1</sup> DW) among two water regimes and four soaking treatments (untreated, 0, 2.5, and 25 mM). Values are means ± SE of DW (n = 12). Different letters indicate statistically significant differences (*p* < 0.05).

|                                        |           | TPC             | TFC            | OD            | ABTS <sup>+</sup> | TSS              | TSP           |
|----------------------------------------|-----------|-----------------|----------------|---------------|-------------------|------------------|---------------|
| <b>Watering Regime (W)</b>             |           |                 |                |               |                   |                  |               |
| WW                                     |           | 23.42 ± 0.177 a | 23.0 ± 1.88    | 176 ± 1.69 b  | 215 ± 2.18 a      | 210 ± 10.4       | 193 ± 3.98 a  |
| WD                                     |           | 21.81 ± 0.289 b | 24.8 ± 1.34    | 183 ± 1.52 a  | 199 ± 2.80 b      | 196 ± 3.92       | 158 ± 4.92 b  |
| <b>Soaking (S)</b>                     |           |                 |                |               |                   |                  |               |
|                                        | Untreated | 21.5 ± 0.32 c   | 24.7 ± 2.00 ab | 173 ± 1.52 b  | 200 ± 1.74 b      | 200 ± 5.17<br>b  | 183 ± 2.41 a  |
|                                        | Water     | 21.7 ± 0.36 bc  | 20.1 ± 1.77 b  | 178 ± 1.74 b  | 205 ± 3.97 b      | 201 ± 5.45<br>bc | 183 ± 7.38 a  |
|                                        | 2.5 mM Se | 23.7 ± 0.23 a   | 28.4 ± 1.95 a  | 184 ± 1.40 a  | 215 ± 2.58 a      | 216 ± 10.4<br>a  | 169 ± 5.38 b  |
|                                        | 25 mM Se  | 22.5 ± 0.22 b   | 23.4 ± 2.04 ab | 177 ± 2.91 b  | 203 ± 3.47 b      | 185 ± 1.49 c     | 175 ± 6.70 ab |
| <b>W x S</b>                           |           |                 |                |               |                   |                  |               |
| WW                                     | Untreated | 22.4 ± 0.36 b   | 23.5 ± 3.27    | 174 ± 1.89 bc | 204 ± 3.56        | 194 ± 5.89<br>b  | 179 ± 3.57 ab |
|                                        | Water     | 23.4 ± 0.19 ab  | 15.0 ± 1.24    | 181 ± 2.76 ab | 218 ± 3.32        | 193 ± 5.21<br>b  | 214 ± 7.74 a  |
|                                        | 2.5 mM Se | 24.1 ± 0.33 a   | 27.8 ± 3.26    | 180 ± 1.51 ab | 219 ± 3.17        | 239 ± 2.34<br>a  | 191 ± 4.28 ab |
|                                        | 25 mM Se  | 22.7 ± 0.17 ab  | 25.8 ± 3.31    | 166 ± 2.20 c  | 208 ± 4.00        | 184 ± 3.43<br>b  | 176 ± 3.46 bc |
| WD                                     | Untreated | 20.5 ± 0.38 c   | 26.3 ± 1.79    | 173 ± 2.46 bc | 195 ± 6.20        | 210 ± 0.28<br>b  | 187 ± 2.89 ab |
|                                        | Water     | 20.4 ± 0.23 c   | 24.8 ± 2.49    | 175 ± 1.89 bc | 190 ± 3.18        | 206 ± 7.22<br>b  | 155 ± 2.81 cd |
|                                        | 2.5 mM Se | 23.3 ± 0.24 ab  | 29.1 ± 1.48    | 188 ± 1.62 a  | 209 ± 3.46        | 194 ± 5.33<br>b  | 146 ± 3.31 d  |
|                                        | 25 mM Se  | 22.3 ± 0.45 b   | 20.4 ± 1.68    | 188 ± 2.13 a  | 198 ± 5.48        | 187 ± 1.50<br>b  | 174 ± 13.2 bc |
| <b>Two-way ANOVA (<i>p</i>-values)</b> |           |                 |                |               |                   |                  |               |
|                                        | W         | <0.0001         | 0.2678         | <0.0001       | <0.0001           | 0.3990           | <0.0001       |
|                                        | S         | <0.0001         | 0.0166         | <0.0001       | 0.0080            | 0.0003           | 0.0418        |
|                                        | W x S     | 0.0003          | 0.0510         | <0.0001       | 0.0900            | <0.0001          | <0.0001       |
